# Supplementary material
Source: publisher site journal article supplement (https://www.dovepress.com/article/390279)
Supplement: Supplementary file 1 [file get_supplementary_file.php]

**Table S1** Variables of Controlling Nutritional Status score

| Variables | Values | Score |
| --- | --- | --- |
| Albumin (g/L) | ≥35 | 0 |
|  | 30-34 | 2 |
|  | 25-29 | 4 |
|  | <25 | 6 |
| Total lymphocyte count (109/L) | ≥1600 | 0 |
|  | 1200-1599 | 1 |
|  | 800-1199 | 2 |
|  | <800 | 3 |
| Total cholesterol (mmol/L) | ≥4.65 | 0 |
|  | 3.62-4.64 | 1 |
|  | 2.58-3.61 | 2 |
|  | <2.58 | 3 |
| Dysnutritional states: normal 0–1; mild 2–4; moderate 5–8; severe 9–12. | | |
